# Supplementary material
Source: publisher figshare collection journal article supplement (https://acs.figshare.com/ndownloader/files/8978218)
Supplement: Supplementary file 1 [file 8978218]

# **Cyclic carbonates as safe and versatile etherifying agents for the functionalization of lignins and tannins**

Antoine Duval, Luc Avérous\*

*BioTeam/ICPEES-ECPM, UMR CNRS 7515, Université de Strasbourg, 25 rue Becquerel, 67087*

*Strasbourg Cedex 2, France*

\* Corresponding author: Prof. Luc Avérous, Phone: + 333 68852784, Fax: + 333 68852716, E-mail:

[luc.averous@unistra.fr](mailto:luc.averous@unistra.fr)

## **Electronic Supplementary Information**

*14 pages, 23 Figures and 2 Schemes.*

## Additional Figures

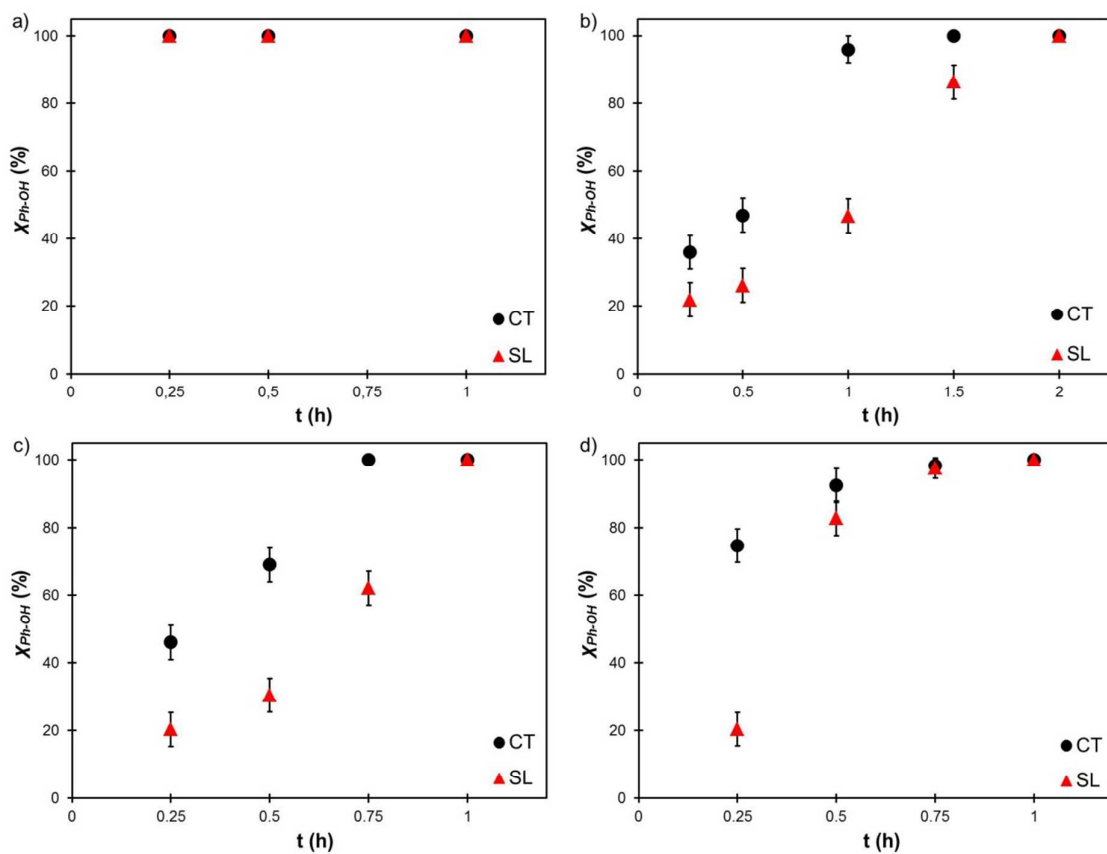

**Figure S1.** Evolution of the conversion of phenol groups ( $X_{Ph-OH}$ ) of CT and SL during reactions with EC (a), PC (b), GC (c) and VEC (d).

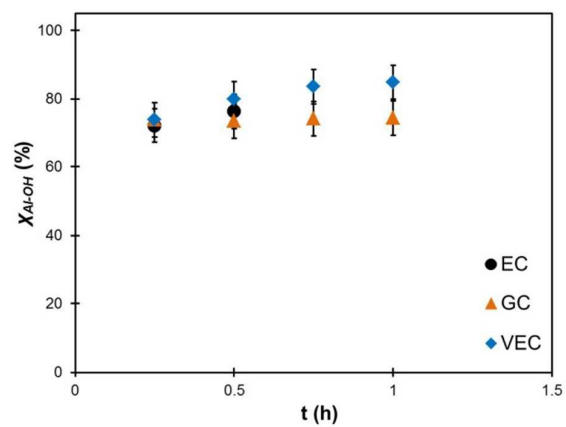

**Figure S2.** Evolution of the conversion of the aliphatic OH groups ( $\chi_{Al-OH}$ ) of CT during the reaction with EC, GC and VEC.

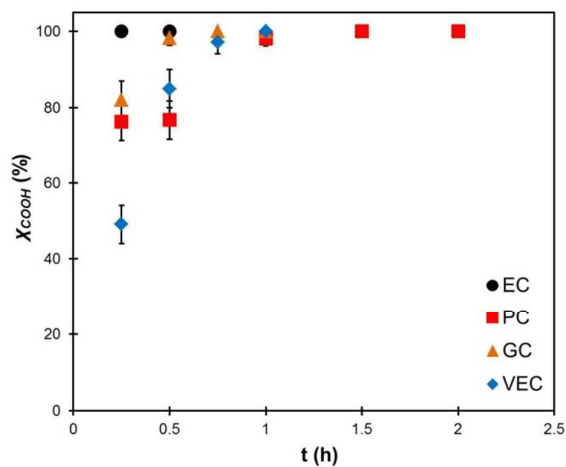

**Figure S3.** Evolution of the conversion of the carboxyl groups ( $\chi_{COOH}$ ) of SL during the reaction with EC, PC, GC and VEC.

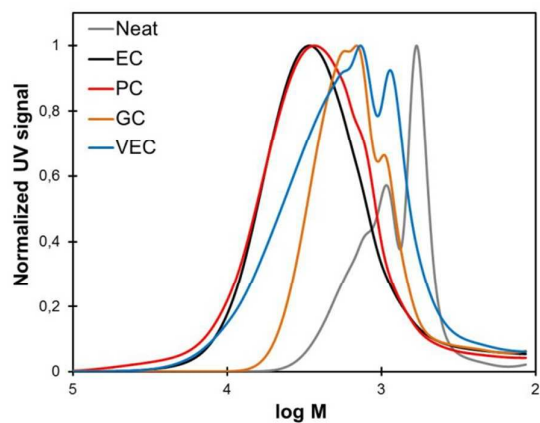

**Figure S4.** SEC traces of the CT derivatives obtained with the different cyclic carbonates. Acetylated samples in THF, PS calibration.

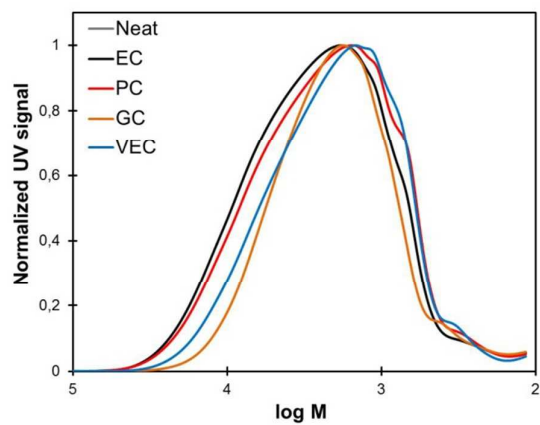

**Figure S5.** SEC traces of the SL derivatives obtained with the different cyclic carbonates. Acetylated samples in THF, PS calibration.

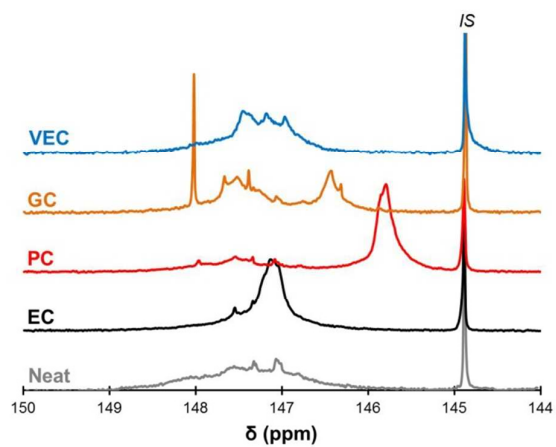

**Figure S6.** Detail of the aliphatic OH region of the  $^{31}\text{P}$  NMR spectra of SL derivatives obtained with the different cyclic carbonates. *IS* = internal standard (cholesterol).

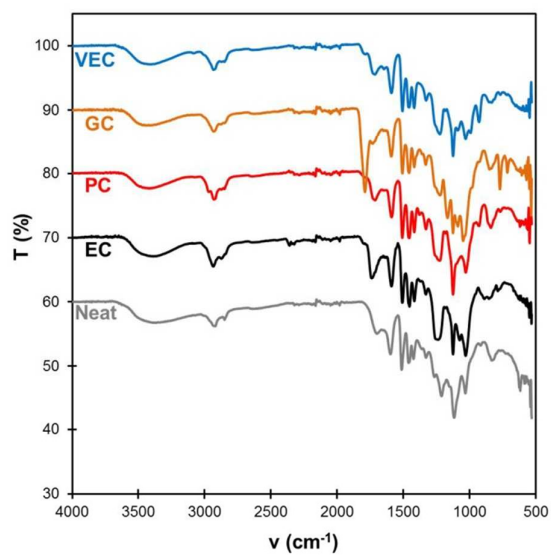

**Figure S7.** FTIR spectra of SL modified with the different cyclic carbonates.

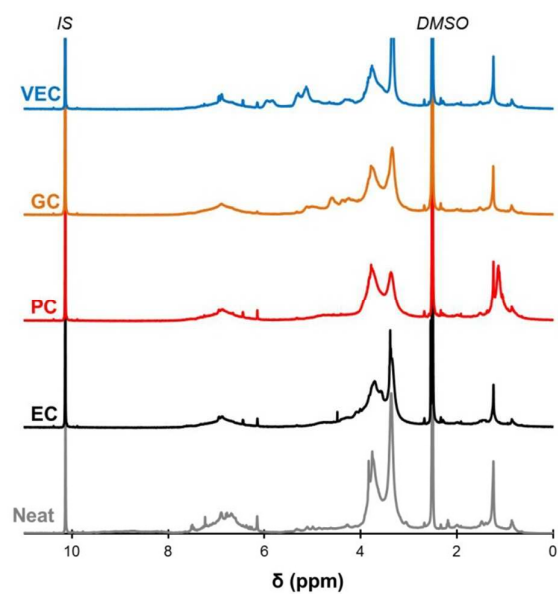

**Figure S8.**  $^1\text{H}$  NMR spectra of SL modified with the different cyclic carbonates.

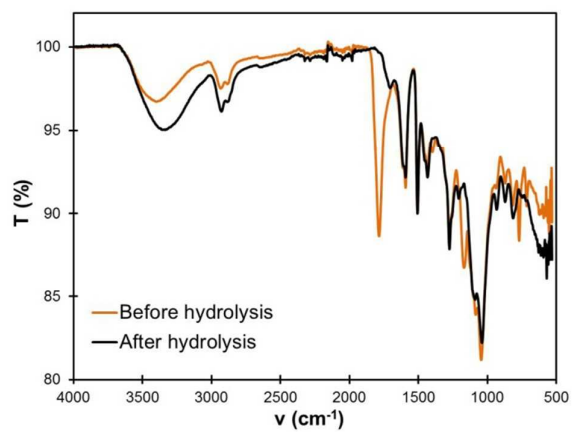

**Figure S9.** FTIR spectra of the CT derivative obtained with GC before and after hydrolysis.

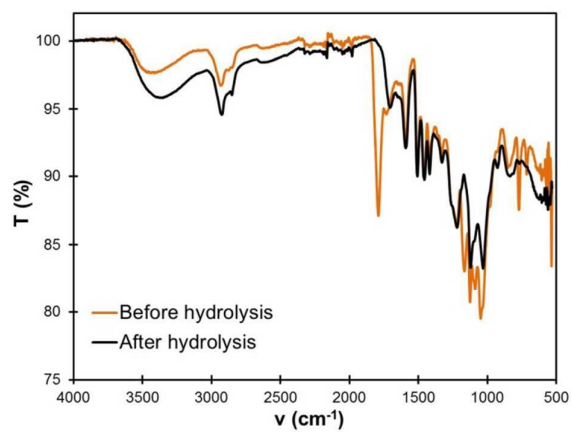

**Figure S10.** FTIR spectra of the SL derivative obtained with GC before and after hydrolysis.

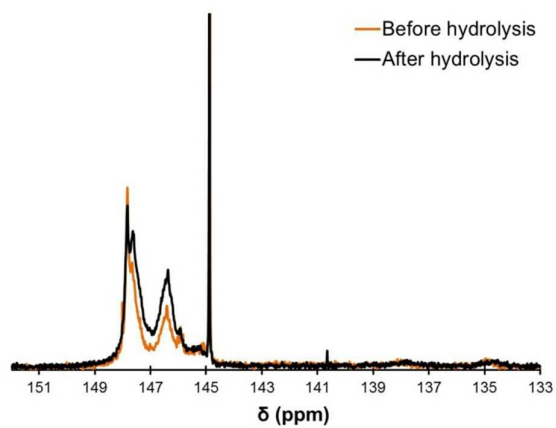

**Figure S11.**  $^{31}\text{P}$  NMR spectra of the CT derivative obtained with GC before and after hydrolysis.

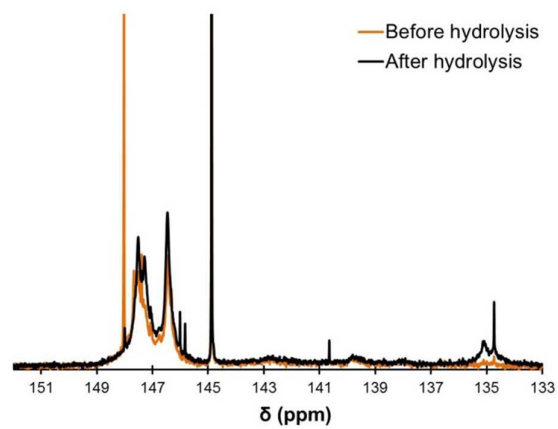

**Figure S12.**  $^{31}\text{P}$  NMR spectra of the SL derivative obtained with GC before and after hydrolysis.

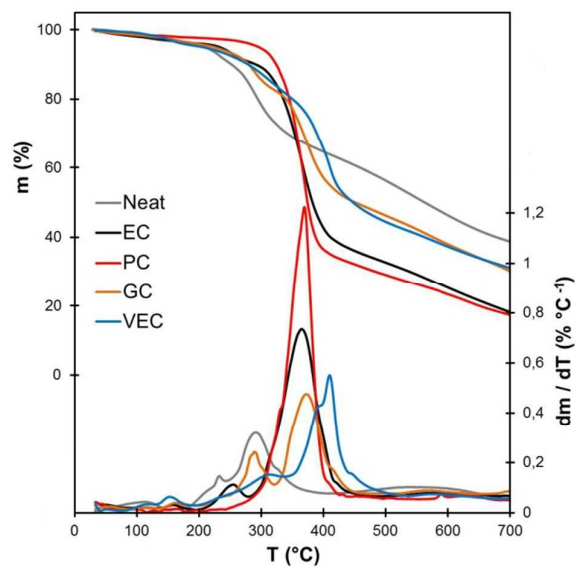

**Figure S13.** Thermogravimetric analysis of CT derivatives obtained with the different cyclic carbonates.



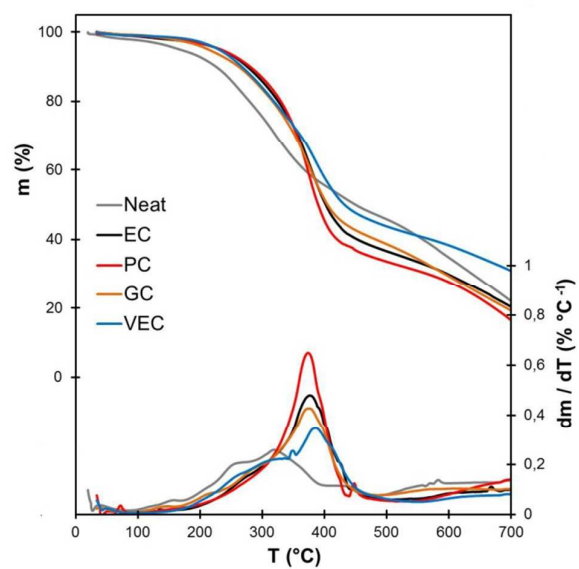

**Figure S14.** Thermogravimetric analysis of SL derivatives obtained with the different cyclic carbonates.

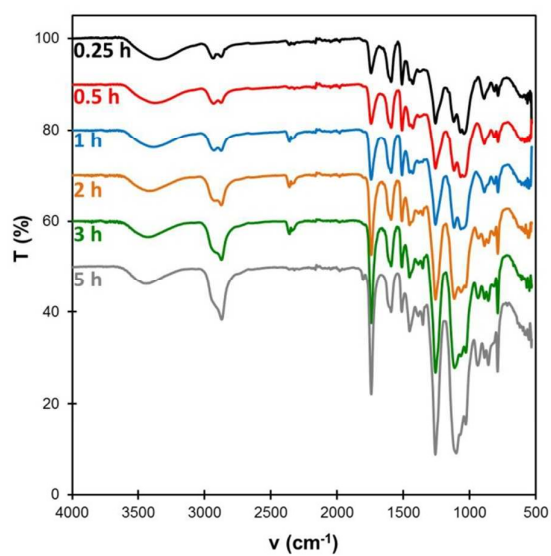

**Figure S15.** FTIR spectra of CT reacted with EC for increasing reaction times.

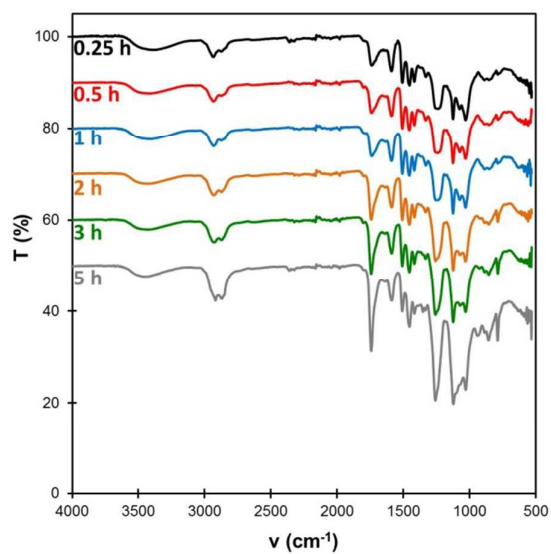

**Figure S16.** FTIR spectra of SL reacted with EC for increasing reaction times.

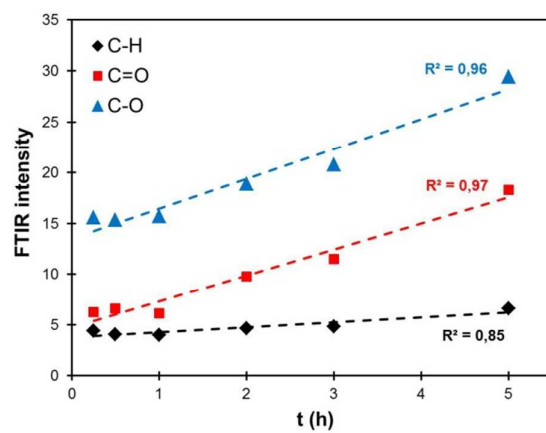

**Figure S17.** Evolution of the intensities of the FTIR peaks of C-H ( $2933\text{ cm}^{-1}$ ), C=O ( $1740\text{ cm}^{-1}$ ) and C-O ( $1257\text{ cm}^{-1}$ ) stretches with the reaction time during the reaction between SL and EC.

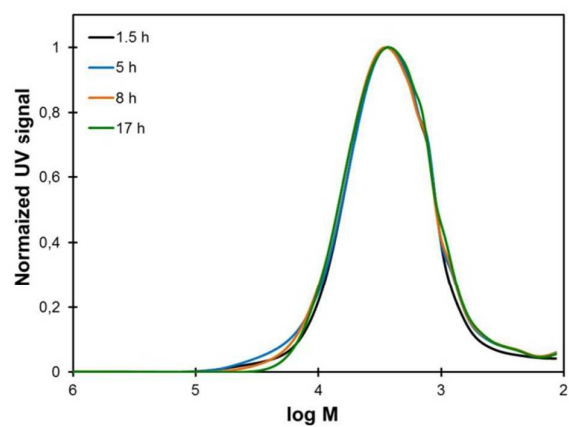

**Figure S18.** SEC traces of the CT derivatives obtained after various reaction times with PC.

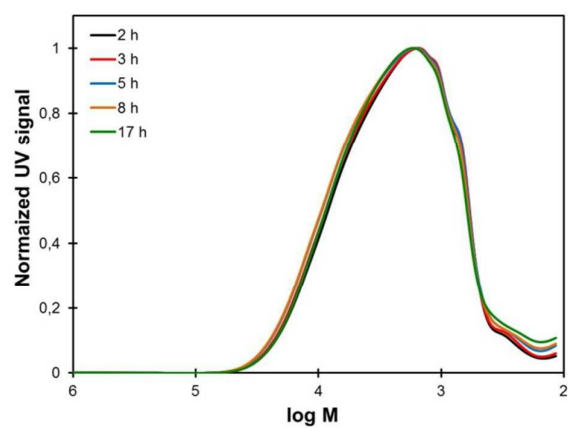

**Figure S19.** SEC traces of the SL derivatives obtained after various reaction times with PC.

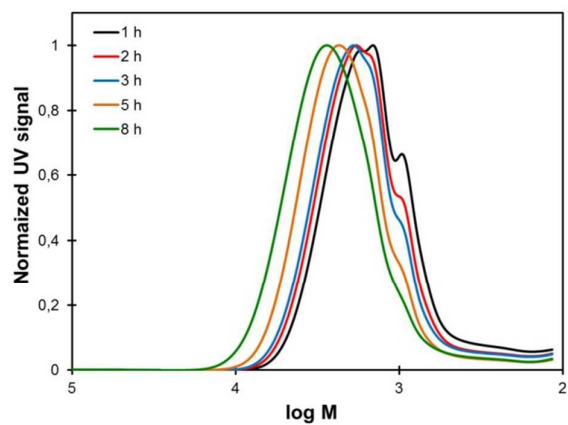

**Figure S20.** SEC traces of the CT derivatives obtained after various reaction times with GC.

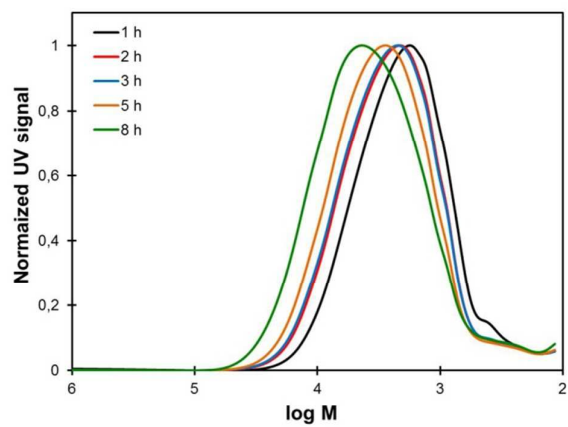

**Figure S21.** SEC traces of the SL derivatives obtained after various reaction times with GC.

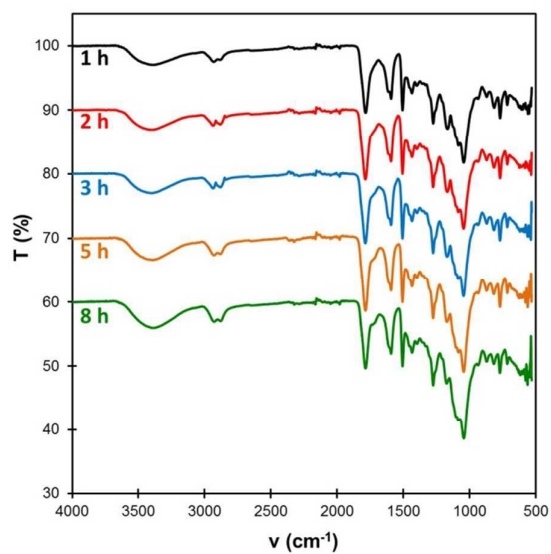

**Figure S22.** FTIR spectra of CT reacted with GC for increasing reaction times.

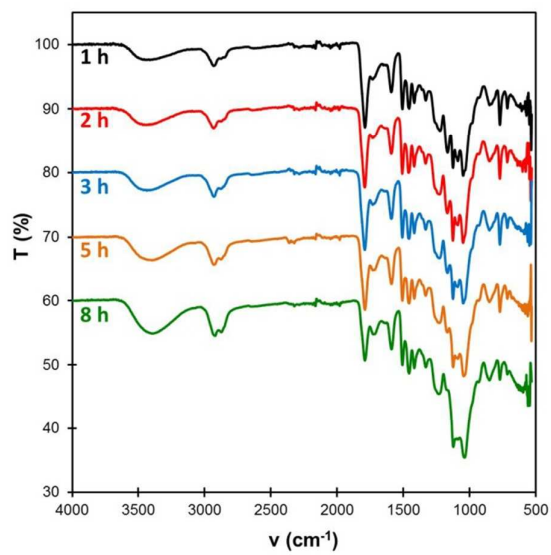

**Figure S23.** FTIR spectra of SL reacted with GC for increasing reaction times.

## Additional reaction schemes

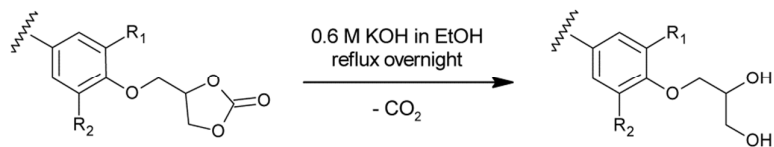

**Scheme S1.** Hydrolysis of the 5-membered cyclic carbonates present on the derivatives prepared with GC.

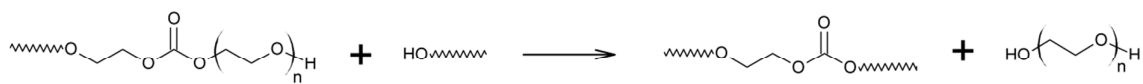

**Scheme S2.** Chain coupling by transesterification, leading to crosslinking during the reaction with EC for extended reaction time.
